# Supplementary material
Source: publisher figshare collection journal article supplement (https://frontiersin.figshare.com/ndownloader/files/34871382)
Supplement: Supplementary file [file 34871382]

Supplementary Materials

**Separate but related: Dimensions of Healthcare Provider Social Support in  
Day-Treatment Oncology Units**

Manuela Tomai<sup>1</sup>, Marco Lauriola<sup>2</sup>

<sup>1</sup> Department of Dynamic and Clinical Psychology, and Health, Sapienza, University of  
Rome

<sup>2</sup> Department of Social and Developmental Psychology, Sapienza, University of Rome

## **Table of Contents**

- 1) Translation of the Healthcare Provider Social Support scale (HPSS)**
- 2) SPSS Syntax for Scoring of the Healthcare Provider Social Support scale (HPSS)**
- 3) Reference data for standardizing the patient's scores (Data from Study 1 and 2 combined)**
- 4) Supplementary Figure S1**
- 5) Supplementary Table S1**
- 6) Supplementary Figure S2**
- 7) Supplementary Table S2**
- 8) Supplementary Table S3**

### 1) Translation of the Healthcare Provider Social Support scale (HPSS)

Below you will find some statements that describe the relationship between patient and hospital staff. Would you please indicate how much each statement describes your perception? If the meaning of each statement seems too vague or poorly understood, you can consider the examples for each statement. (We ask you to answer by marking a cross on the box that best describes your response)

Your healthcare provider .....

1. **Comforted you by physically expressing his affection.** (e.g., patting you on the shoulder or making an affectionate gesture).

|       |           |           |       |        |
|-------|-----------|-----------|-------|--------|
| Never | Few times | Sometimes | Often | Always |
|-------|-----------|-----------|-------|--------|

2. **Has been listening to you talk about your feelings.** (e.g., lingering to talk to you beyond the time strictly necessary to do his job; or allowing you time to talk to him about your fears).

|       |           |           |       |        |
|-------|-----------|-----------|-------|--------|
| Never | Few times | Sometimes | Often | Always |
|-------|-----------|-----------|-------|--------|

3. **Has shown interest and concern for your well-being.** (e.g., trying to figure out how you feel, as well as how you are physically or what ailments the medications are giving you).

|       |           |           |       |        |
|-------|-----------|-----------|-------|--------|
| Never | Few times | Sometimes | Often | Always |
|-------|-----------|-----------|-------|--------|

4. **Let you know that he/she understands your mood and concerns.** (e.g., telling you how he/she has felt in a difficult situation).

|       |           |           |       |        |
|-------|-----------|-----------|-------|--------|
| Never | Few times | Sometimes | Often | Always |
|-------|-----------|-----------|-------|--------|

5. **Was present and heartened you in a stressful situation for you.** (e.g., during a medical examination or while administering therapy).

|       |           |           |       |        |
|-------|-----------|-----------|-------|--------|
| Never | Few times | Sometimes | Often | Always |
|-------|-----------|-----------|-------|--------|

6. **Suggested a few actions you should take** (e.g., following a dietary regimen, informing a family member of your health condition)

|       |           |           |       |        |
|-------|-----------|-----------|-------|--------|
| Never | Few times | Sometimes | Often | Always |
|-------|-----------|-----------|-------|--------|

7. **Gave you useful information to solve your problem** (e.g., telling you what steps to take to request medical help or how to locate a specialist).

|       |           |           |       |        |
|-------|-----------|-----------|-------|--------|
| Never | Few times | Sometimes | Often | Always |
|-------|-----------|-----------|-------|--------|

8. **Explained the pros and cons of each option you had to choose from.** (e.g., by clearly explaining the advantages or disadvantages of a decision)

|       |           |           |       |        |
|-------|-----------|-----------|-------|--------|
| Never | Few times | Sometimes | Often | Always |
|-------|-----------|-----------|-------|--------|

9. **Made you aware of what was coming.** (e.g., discomfort you may have had during a medical examination or administration of therapy)

|       |           |           |       |        |
|-------|-----------|-----------|-------|--------|
| Never | Few times | Sometimes | Often | Always |
|-------|-----------|-----------|-------|--------|

10. **Taught you how to do something.** (e.g., how to dress a burn, how to expose yourself to the sun during chemotherapy).

|       |           |           |       |        |
|-------|-----------|-----------|-------|--------|
| Never | Few times | Sometimes | Often | Always |
|-------|-----------|-----------|-------|--------|

11. **Did some activity with you to help distract you.** (e.g., watch a sporting event or a live TV broadcast, read a newspaper or comment on some news together).

|       |           |           |       |        |
|-------|-----------|-----------|-------|--------|
| Never | Few times | Sometimes | Often | Always |
|-------|-----------|-----------|-------|--------|

12. **Took you to someone who could take action.** (e.g., in health care management or administration).

|       |           |           |       |        |
|-------|-----------|-----------|-------|--------|
| Never | Few times | Sometimes | Often | Always |
|-------|-----------|-----------|-------|--------|

13. **Helped you do something that needed to be done.** (e.g., meeting with a counselor, booking a medical appointment you needed to make).

|       |           |           |       |        |
|-------|-----------|-----------|-------|--------|
| Never | Few times | Sometimes | Often | Always |
|-------|-----------|-----------|-------|--------|

14. **Lent you or gave you something you needed.**

(e.g., an object, not money).

|       |           |           |       |        |
|-------|-----------|-----------|-------|--------|
| Never | Few times | Sometimes | Often | Always |
|-------|-----------|-----------|-------|--------|

15. **Performed some tasks for you that you could not do for yourself at that time.** (e.g., making a phone call, filling out a form, or any other concrete action).

|       |           |           |       |        |
|-------|-----------|-----------|-------|--------|
| Never | Few times | Sometimes | Often | Always |
|-------|-----------|-----------|-------|--------|

16. **Let you know that he/she approves of the way you deal with situations.** (e.g., agreeing with you on how you react to a stressful event).

|       |           |           |       |        |
|-------|-----------|-----------|-------|--------|
| Never | Few times | Sometimes | Often | Always |
|-------|-----------|-----------|-------|--------|

17. **Has expressed appreciation or respect for any of your skills or abilities.** (e.g., asking for an opinion or advice on something you are an expert in).

|       |           |           |       |        |
|-------|-----------|-----------|-------|--------|
| Never | Few times | Sometimes | Often | Always |
|-------|-----------|-----------|-------|--------|

18. **Considered you a reliable person, who can be trusted** (e.g., Appreciating your accuracy/accuracy in following your medication intake or diet)

|       |           |           |       |        |
|-------|-----------|-----------|-------|--------|
| Never | Few times | Sometimes | Often | Always |
|-------|-----------|-----------|-------|--------|

19. **Treated you as an equal.** (e.g., Speaking to you with "ease," avoiding using incomprehensible terms or expressions).

|       |           |           |       |        |
|-------|-----------|-----------|-------|--------|
| Never | Few times | Sometimes | Often | Always |
|-------|-----------|-----------|-------|--------|

20. **Let you know that he/she appreciates you as a "person."** (e.g., by showing you that he is comfortable talking to you, or that he is impressed by your likability).

|       |           |           |       |        |
|-------|-----------|-----------|-------|--------|
| Never | Few times | Sometimes | Often | Always |
|-------|-----------|-----------|-------|--------|

**THANK YOU FOR YOUR COOPERATION**

## **2) SPSS Syntax for Scoring of the Healthcare Provider Social Support scale (HPSS)**

COMPUTE Emotional=sum(HPSS1 to HPSS5).

COMPUTE Information=sum(HPSS6 to HPSS10).

COMPUTE Instrumental=sum(HPSS11 to HPSS15).

COMPUTE Appraisal=sum(HPSS16 to HPSS20).

COMPUTE Total=sum(HPSS1 to HPSS20).

EXECUTE.

**3) Reference data for standardizing the patient's scores (Data from Study 1 and 2 combined, N = 230)**

| Score         | Min | Max | M     | SD    |
|---------------|-----|-----|-------|-------|
| Emotional     | 5   | 25  | 16.69 | 6.09  |
| Informational | 5   | 25  | 17.05 | 5.58  |
| Instrumental  | 5   | 25  | 9.41  | 4.71  |
| Appraisal     | 5   | 25  | 16.44 | 5.29  |
| Total         | 21  | 100 | 59.54 | 17.43 |
|               |     |     |       |       |

**4) Figure S1. Non-intersection of item characteristics curves (right panels) and monotonicity plots (left panels) for the 20 items that make up the total HPSS score.**

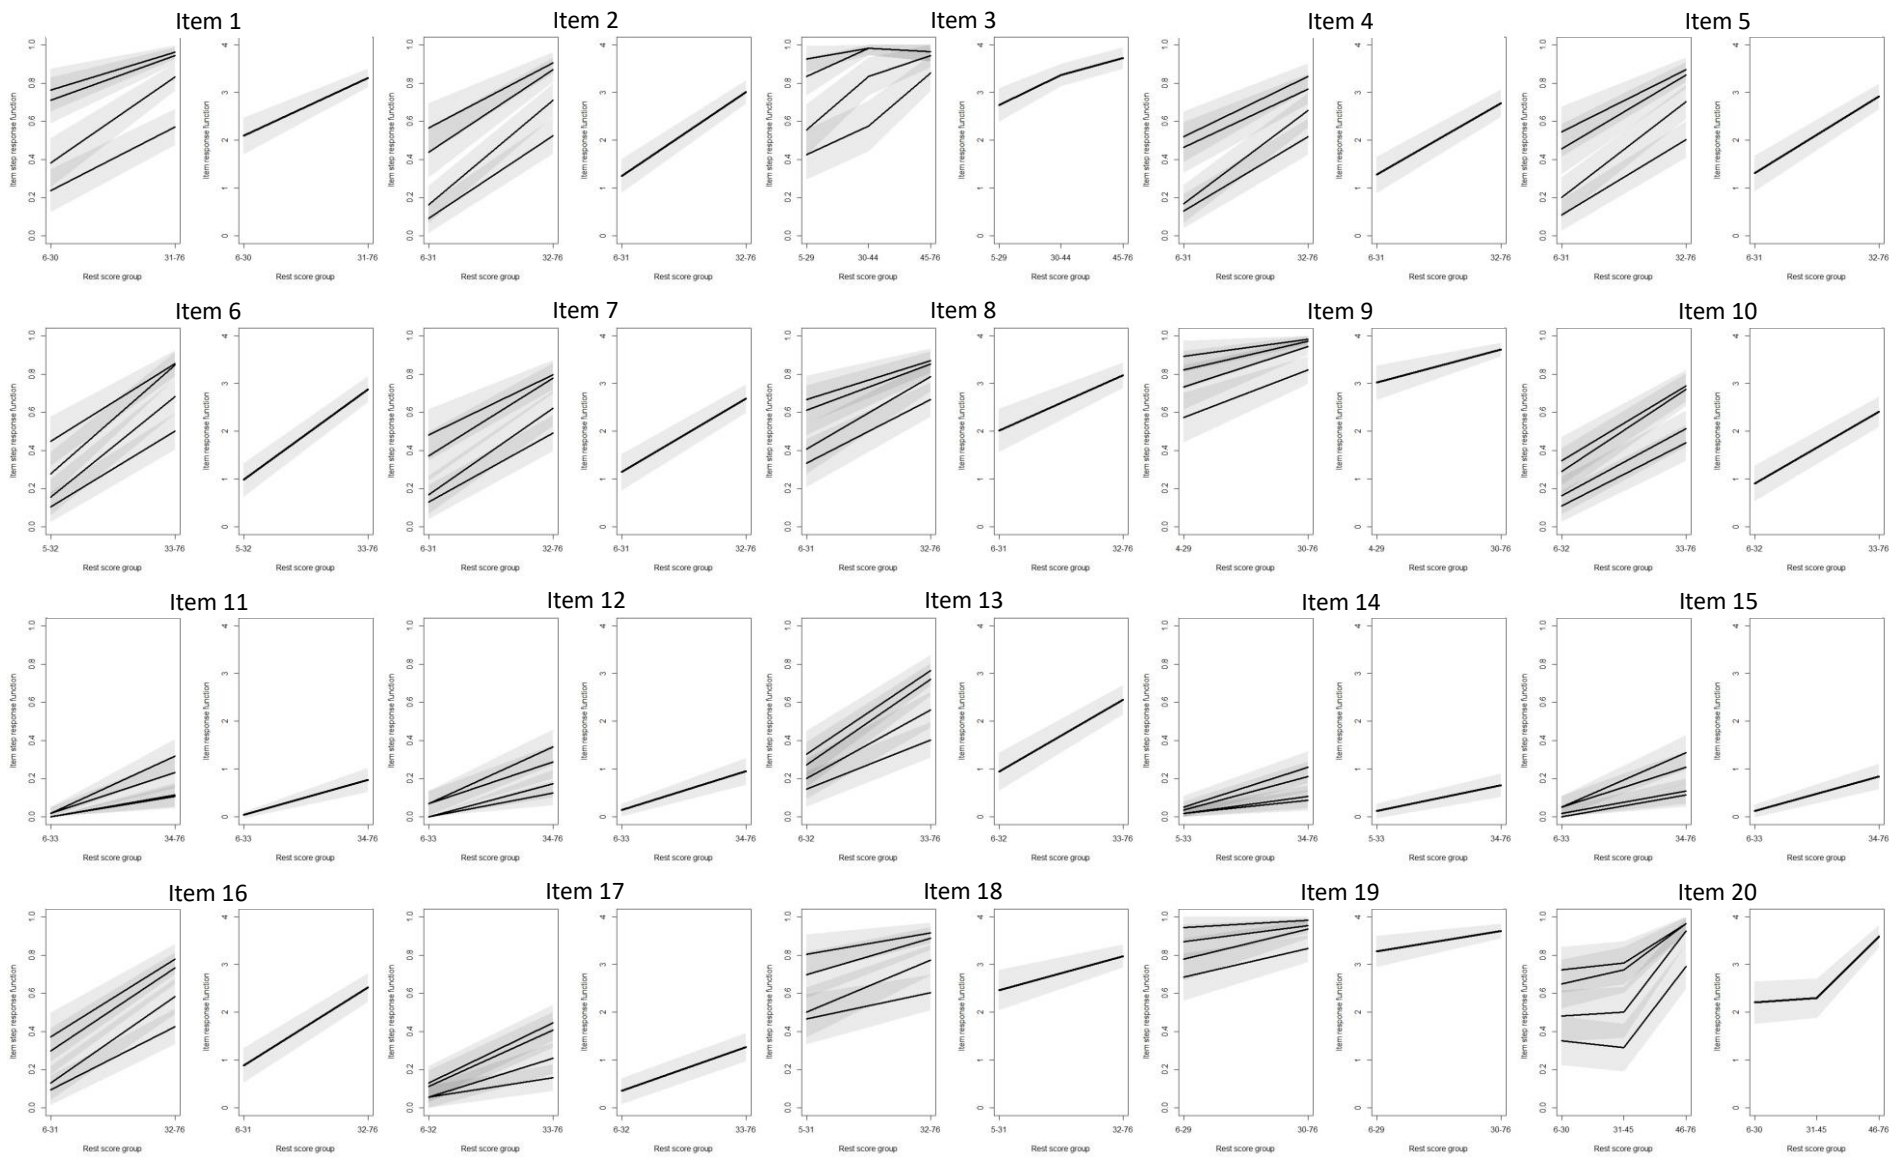



5) **Table S1. Abridged output of monotonicity assessment for the 20 items that make up the total HPSS score.**

|         | ac | vi | sig | crit |
|---------|----|----|-----|------|
| ITEM 1  | 4  | 0  | 0   | 0    |
| ITEM 2  | 4  | 0  | 0   | 0    |
| ITEM 3  | 12 | 0  | 0   | 0    |
| ITEM 4  | 4  | 0  | 0   | 0    |
| ITEM 5  | 4  | 0  | 0   | 0    |
| ITEM 6  | 4  | 0  | 0   | 0    |
| ITEM 7  | 4  | 0  | 0   | 0    |
| ITEM 8  | 4  | 0  | 0   | 0    |
| ITEM 9  | 4  | 0  | 0   | 0    |
| ITEM 10 | 4  | 0  | 0   | 0    |
| ITEM 11 | 2  | 0  | 0   | 0    |
| ITEM 12 | 2  | 0  | 0   | 0    |
| ITEM 13 | 4  | 0  | 0   | 0    |
| ITEM 14 | 4  | 0  | 0   | 0    |
| ITEM 15 | 3  | 0  | 0   | 0    |
| ITEM 16 | 4  | 0  | 0   | 0    |
| ITEM 17 | 4  | 0  | 0   | 0    |
| ITEM 18 | 4  | 0  | 0   | 0    |
| ITEM 19 | 4  | 0  | 0   | 0    |
| ITEM 20 | 12 | 1  | 0   | 20   |

Legend: ac = active comparisons, vi = violations, sig = number of significant violations, crit = crit score

Note: A Crit score less than 40 is not evidence of model misfit. A Crit score greater than 80 is strong evidence of model misfit.

6) **Figure S2. Non-intersection of item characteristics curves (right panels) and monotonicity plots (left panels) for the items that make up the Emotional (1-5), Information (6-10), Instrumental (11-15), and Appraisal (16-20) HPSS subscales.**

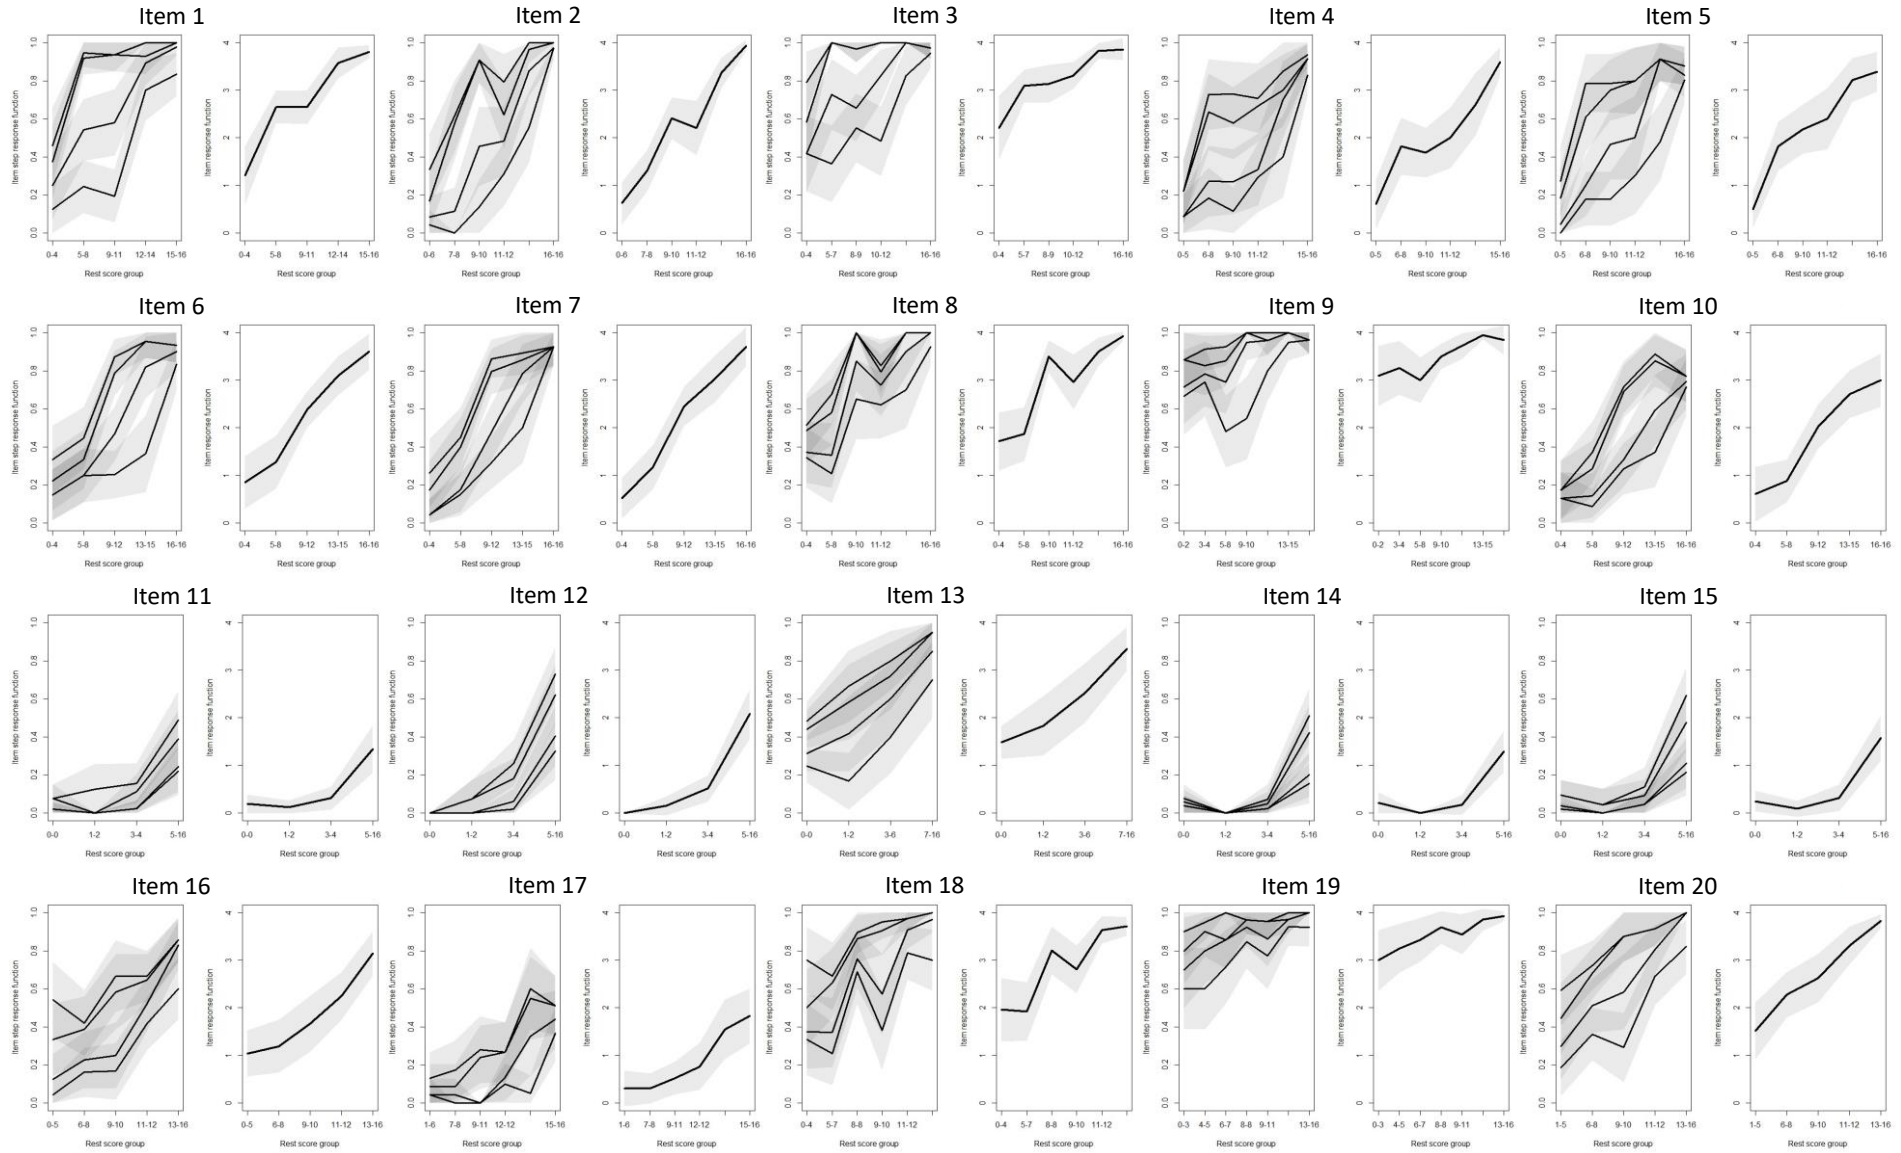

7) **Table S2. Abridged output of monotonicity assessment for the items that make up the Emotional (1-5), Information (6-10), Instrumental (11-15), and Appraisal (16-20) HPSS subscales.**

|         | ac | vi | sig | crit |
|---------|----|----|-----|------|
| ITEM 1  | 29 | 1  | 0   | 1    |
| ITEM 2  | 42 | 3  | 1   | 62   |
| ITEM 3  | 40 | 5  | 0   | 26   |
| ITEM 4  | 60 | 2  | 0   | 8    |
| ITEM 5  | 55 | 3  | 0   | 14   |
| ITEM 6  | 40 | 0  | 0   | 0    |
| ITEM 7  | 40 | 0  | 0   | 0    |
| ITEM 8  | 33 | 4  | 1   | 74   |
| ITEM 9  | 59 | 13 | 0   | 85   |
| ITEM 10 | 40 | 3  | 0   | 28   |
| ITEM 11 | 18 | 1  | 0   | 16   |
| ITEM 12 | 8  | 0  | 0   | 0    |
| ITEM 13 | 24 | 1  | 0   | 9    |
| ITEM 14 | 16 | 4  | 0   | 44   |
| ITEM 15 | 20 | 3  | 0   | 22   |
| ITEM 16 | 40 | 1  | 0   | 21   |
| ITEM 17 | 50 | 7  | 0   | 30   |
| ITEM 18 | 50 | 5  | 1   | 80   |
| ITEM 19 | 59 | 5  | 0   | 26   |
| ITEM 20 | 28 | 1  | 0   | 11   |

Legend: ac = active comparisons, vi = violations, sig = number of significant violations, crit = crit score

Note: A Crit score less than 40 is not evidence of model misfit. A Crit score greater than 80 is strong evidence of model misfit.
